# Supplementary material for: Influence of transition metals (M = Co, Fe and Mn) on ordered mesoporous CuM/CeO2 catalysts and applications in selective catalytic reduction of NOx with H2
Source: Royal Society of Chemistry journal article supplement (doi:10.1039/c5ra12027f), 2015-01-01
Supplement: c5ra12027f1.pdf [file c5ra12027f1.pdf]

## Influence of Transition Metal (M = Co, Fe and Mn) on Ordered Mesoporous CuM/CeO<sub>2</sub> and Catalytic application in Selective Catalytic Reduction of NO<sub>x</sub> with H<sub>2</sub>

Xiuyun Wang, Wu Wen, Yanqing Su and Ruihu Wang\*

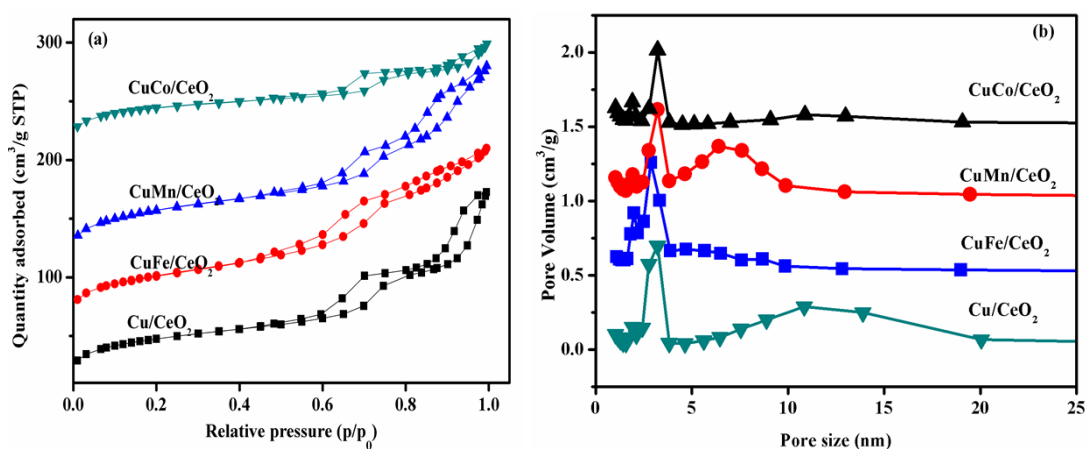

**Fig. S1** N<sub>2</sub> physisorption isotherms (a) and pore-size distribution curves (b) for Cu/CeO<sub>2</sub> and CuM/CeO<sub>2</sub>.

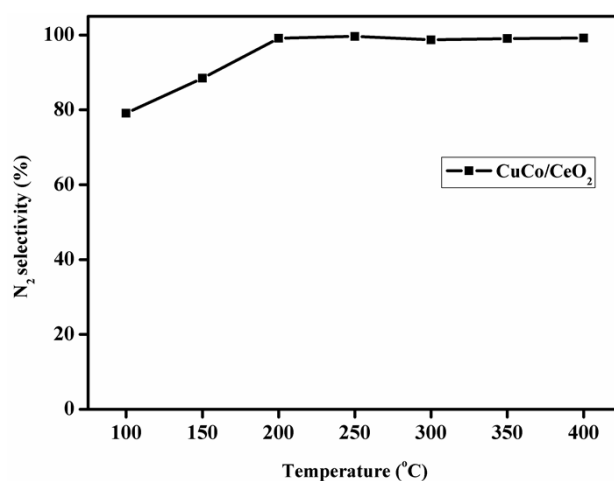

**Fig. S2** N<sub>2</sub> selectivity of CuCo/CeO<sub>2</sub> at 100-400 °C.

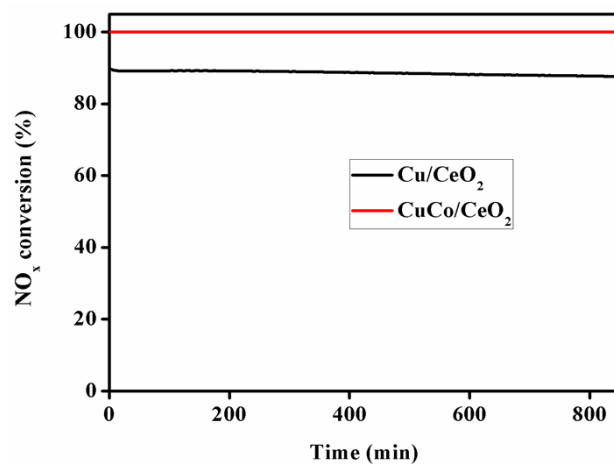

**Fig. S3** Stability test of Cu/CeO<sub>2</sub> and CuCo/CeO<sub>2</sub> at 390 °C.

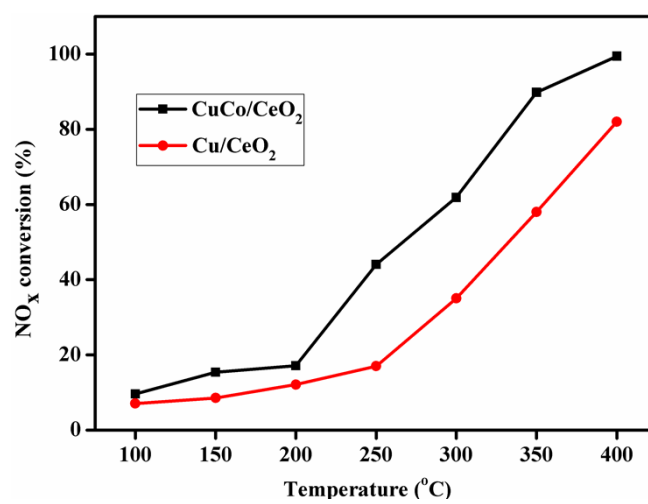

**Fig. S4** NO<sub>x</sub> conversion of CuCo/CeO<sub>2</sub> and Cu/CeO<sub>2</sub> in the presence of 100 ppm SO<sub>2</sub> at 100-400 °C.
